# Supplementary material for: Left Heart Disease Phenotype in Elderly Patients with Pulmonary Arterial Hypertension: Insights from the Italian PATRIARCA Registry
Source: MDPI journal article supplement (doi:10.3390/jcm11237136), 2022-11-30
Supplement: s1 [file s1]

# Left heart disease phenotype in elderly patients with pulmonary arterial hypertension: insights from the Italian PATRIARCA registry.

Matteo Toma, Roberta Miceli, Edoardo Bonsante, Davide Colombo, Marco Confalonieri, Andrea Garascia, Stefano Ghio, Mariangela Lattanzio, Carlo Maria Lombardi, Giuseppe Paciocco, Cristina Piccinino, Irene Rota, Caterina Santolamazza, Laura Scelsi, Piermario Scuri, Davide Stolfo, Antonella Vincenzi, Lorenzo Volpiano, Marco Vicenzi and Pietro Ameri.

## SUPPLEMENTARY MATERIALS

### Table of contents

**Table S1:** Patient enrollment across the PATRIARCA registry.

**Table S2:** Baseline characteristics according to the presence of the main analysis clinical criteria suggestive for left heart disease.

**Table S3.** Baseline characteristics according to the presence of the main analysis hemodynamic criteria suggestive for left heart disease.

**Table S4.** Baseline characteristics of the study population according to the secondary analysis.

**Table S5.** Baseline characteristics of the study population according to the secondary analysis clinical criteria suggestive for left heart disease.

**Table S1.** Patient enrolment across the PATRIARCA registry.

| Center                                                                 | Enrolled patients Included in the analysis |         |
|------------------------------------------------------------------------|--------------------------------------------|---------|
|                                                                        | (N=180)                                    | (N=69)  |
| Cardiology, IRCCS Policlinico San Matteo, Pavia                        | 56 (31)                                    | 23 (33) |
| Cardiology, IRCCS Policlinico San Martino, Genova                      | 28 (16)                                    | 9 (13)  |
| Cardiology, Ospedale San Gerardo, Monza                                | 20 (11)                                    | 9 (13)  |
| Cardiology, Ospedale di Bolzano                                        | 14 (8)                                     | 2 (3)   |
| Cardiology, IRCCS Ca' Granda Ospedale Maggiore Policlinico, Milano     | 12 (7)                                     | 3 (4)   |
| ASST Grande Ospedale Metropolitano Niguarda, Milano                    | 12 (7)                                     | 8 (12)  |
| Cardiology, Azienda sanitaria Universitaria Giuliano Isontina, Trieste | 10 (6)                                     | 4 (6)   |
| Cardiology, ASST degli Spedali Civili, Brescia                         | 10 (6)                                     | 2 (3)   |
| Cardiology, Ospedale di Circolo e Fondazione Macchi, Varese            | 9 (5)                                      | 4 (6)   |
| Cardiology, ASST Papa Giovanni XXIII, Bergamo                          | 5 (3)                                      | 3 (4)   |
| Cardiology, Ospedale Maggiore della Carità, Novara                     | 4 (2)                                      | 2 (3)   |

Patient enrollment across the 11 centers participating in the Italian multicenter PATRIARCA registry between December 1<sup>st</sup> 2019 and September 15th 2020.

Data are expressed as count (%).

**Table S2.** Baseline characteristics according to the presence of the main analysis clinical criteria suggestive for left heart disease.

|                                           | Overall<br>(N=69) | No clinical<br>LHD profile<br>(N=63) | Clinical LHD<br>phenotype<br>(N=6) | P      |
|-------------------------------------------|-------------------|--------------------------------------|------------------------------------|--------|
| Demographics                              |                   |                                      |                                    |        |
| Age at diagnosis, y                       | 73 ± 4            | 73 ± 4                               | 74 ± 3                             | 0.58   |
| Age at enrolment, years                   | 77 ± 5            | 77 ± 4                               | 77 ± 3                             | 0.87   |
| Female                                    | 44 (64)           | 42 (67)                              | 2 (33)                             | 0.12   |
| Weight, Kg                                | 64 ± 15           | 64 ± 15                              | 70 ± 12                            | 0.34   |
| Height, cm                                | 163 ± 9           | 162 ± 8                              | 169 ± 11                           | 0.07   |
| BSA, m <sup>2</sup>                       | 1.70 ± 0.22       | 1.69 ± 0.22                          | 1.81 ± 0.18                        | 0.21   |
| BMI, Kg/m <sup>2</sup>                    | 24 ± 5            | 24 ± 5                               | 25 ± 4                             | 0.82   |
| Clinical and echocardiographic parameters |                   |                                      |                                    |        |
| WHO-FC I-II                               | 32 (46)           | 30 (48)                              | 2 (33)                             | 0.38   |
| Systemic hypertension                     | 45 (65)           | 39 (62)                              | 6 (100)                            | 0.07   |
| Diabetes                                  | 15 (22)           | 9 (14)                               | 6 (100)                            | <0.001 |
| CAD                                       | 17 (25)           | 12 (19)                              | 5 (83)                             | 0.003  |
| Permanent AF                              | 3 (4)             | 3 (5)                                | 6 (100)                            | 0.76   |
| Pulmonary disease                         | 31 (45)           | 27 (43)                              | 4 (67)                             | 0.25   |

|                                        |                   |                   |                   |              |
|----------------------------------------|-------------------|-------------------|-------------------|--------------|
| CKD                                    | 26 (38)           | 21 (33)           | 5 (83)            | <b>0.03</b>  |
| Previous/current cancer                | 8 (12)            | 8 (13)            | 6 (100)           | 0.46         |
| SBP, mmHg                              | 124 ± 15          | 124 ± 14          | 122 ± 19          | 0.71         |
| DBP, mmHg                              | 72 ± 9            | 72 ± 9            | 67 ± 10           | 0.19         |
| SO <sub>2</sub> , %                    | 95 [93; 97]       | 95 [93; 97]       | 96 [88; 97]       | 1            |
| 6MWD, meters                           | 304 ± 199         | 305 ± 123         | 290 ± 73          | 0.81         |
| LVEF <50%                              | 4 (6)             | 3 (5)             | 1 (17)            | 0.25         |
| LVH                                    | 17 (25)           | 16 (25)           | 1 (17)            | 0.53         |
| LA dilation                            | 31 (45)           | 28 (44)           | 3 (50)            | 0.59         |
| TAPSE, mm                              | 20 ± 5            | 21 ± 4            | 17 ± 5            | <b>0.03</b>  |
| TRV, m/s                               | 3.81 ± 0.76       | 3.78 ± 0.76       | 4.10 ± 0.74       | 0.32         |
| TAPSE/TRV                              | 5.6 ± 1.9         | 5.8 ± 1.9         | 4.1 ± 1.2         | 0.05         |
| RVSP, mmHg                             | 57 [42; 77]       | 57 [40; 75]       | 73 [45; 90]       | 0.29         |
| RA dilation                            | 53 (77)           | 47 (75)           | 6 (100)           | 0.25         |
| Pericardial effusion                   | 11 (16)           | 9 (14)            | 2 (33)            | 0.24         |
| Most recent RHC                        |                   |                   |                   |              |
| RAP, mmHg                              | 7 [4; 10]         | 7 [4; 10]         | 6 [2; 10]         | 0.58         |
| mPAP, mmHg                             | 41 ± 10           | 41 ± 11           | 41 ± 10           | 0.98         |
| dPAP, mmHg                             | 25 ± 9            | 26 ± 9            | 23 ± 6            | 0.58         |
| sPAP, mmHg                             | 70 ± 20           | 69 ± 20           | 74 ± 20           | 0.53         |
| PAWP, mmHg                             | 11 ± 4            | 12 ± 4            | 7 ± 2             | <b>0.004</b> |
| RAP/PAWP ratio                         | 0.60 [0.46; 0.75] | 0.58 [0.41; 0.75] | 0.73 [0.67; 1.00] | 0.18         |
| PVR, WU                                | 7.39 ± 4.53       | 7.22 ± 4.54       | 9.14 ± 4.47       | 0.33         |
| Cardiac output, L/min                  | 4.59 ± 1.43       | 4.65 ± 1.46       | 4.04 ± 1.04       | 0.33         |
| Cardiac index, L/min/m <sup>2</sup>    | 2.74 ± 0.81       | 2.78 ± 0.82       | 2.30 ± 0.62       | 0.17         |
| Diagnosis to last RHC interval, months | 15 [4; 33]        | 15 [4; 35]        | 13 [0; 23]        | 0.42         |
| Treatment                              |                   |                   |                   |              |
| No PAH therapy                         | 6 (9)             | 5 (8)             | 1 (17)            | 0.43         |
| Bosentan                               | -                 | -                 | -                 |              |
| Ambrisentan                            | 17 (25)           | 16 (25)           | 1 (17)            | 0.54         |
| Macitentan                             | 32 (46)           | 29 (46)           | 3 (50)            | 0.61         |
| ERA                                    | 49 (71)           | 45 (71)           | 4 (67)            | 0.57         |
| Sildenafil                             | 22 (32)           | 19 (30)           | 3 (50)            | 0.29         |
| Tadalafil                              | 25 (36)           | 24 (38)           | 1 (17)            | 0.29         |
| Riociguat                              | 3 (4)             | 3 (5)             | 0                 | 0.76         |
| PDE5i/GCs                              | 50 (73)           | 46 (73)           | 4 (67)            | 0.53         |
| Dual oral combination therapy          | 36 (52)           | 33 (52)           | 3 (50)            | 0.62         |
| Selexipag                              | 6 (9)             | 6 (10)            | 0                 | 0.57         |
| Treprostinil                           | -                 | -                 | -                 |              |
| Epoprostenol i.v.                      | 1 (1)             | 1 (2)             | 0                 | 0.91         |

|                    |         |         |         |                  |
|--------------------|---------|---------|---------|------------------|
| Inhaled iloprost   | 2 (3)   | 2 (3)   | 0       | 0.83             |
| Beta blockers      | 9 (13)  | 7 (11)  | 2 (33)  | 0.17             |
| RASi               | 23 (33) | 21 (33) | 2 (33)  | 0.69             |
| MRA                | 32 (46) | 26 (41) | 6 (100) | <b>0.007</b>     |
| Furosemide         | 57 (83) | 51 (81) | 6 (100) | 0.24             |
| Digoxin            | 6 (9)   | 6 (10)  | 0       | 0.57             |
| Amiodarone         | 9 (13)  | 9 (14)  | 0       | 0.41             |
| Warfarin           | 11 (16) | 10 (16) | 1 (17)  | 0.67             |
| DOAC               | 11 (16) | 10 (16) | 1 (17)  | 0.67             |
| SAPT               | 22 (32) | 18 (29) | 4 (67)  | 0.07             |
| Statins            | 26 (38) | 22 (35) | 4 (67)  | 0.14             |
| Ezetimibe          | 3 (4)   | 1 (2)   | 2 (33)  | <b>0.02</b>      |
| Antidiabetic drugs | 12 (17) | 6 (10)  | 6 (100) | <b>&lt;0.001</b> |

Characteristics of patients with and without a left heart disease (LHD) phenotype according to the clinical criteria definition in the main analysis. Data are expressed as n (%), mean  $\pm$  SD or median [IQR], as appropriate.

*LHD*, left heart disease; *BSA*, body surface area; *BMI*, body mass index; *PAH*, pulmonary arterial hypertension; *WHO-FC*, World Health Organization functional class; *CAD*, coronary artery disease; *AF*, atrial fibrillation; *CKD*, chronic kidney disease; *SBP*, systolic blood pressure; *DBP*, diastolic blood pressure; *SO<sub>2</sub>*, oxygen saturation; *6MWD*, six minute walking distance; *LVEF*, left ventricular ejection fraction; *LVH*, left ventricular hypertrophy; *LA*, left atrium; *TAPSE*, tricuspid annular plane systolic excursion; *TRV*, tricuspid regurgitant velocity; *RVSP*, right ventricular systolic pressure; *RA*, right atrium; *RHC*, right heart catheterization; *RAP*, right atrial pressure; *mPAP*, *dPAP* and *sPAP* for mean, diastolic and systolic pulmonary artery pressure; *PAWP*, pulmonary artery wedge pressure; *PVR*, pulmonary vascular resistance; *ERA*, endothelin receptor antagonist; *PDE5i*, phosphodiesterase type 5 inhibitor; *GCs*, guanylate cyclase stimulator; *RASi*, renin-angiotensin system inhibitors; *MRA*, mineralcorticoid receptor antagonist; *DOAC*, direct oral anticoagulant; *SAPT*, single antiplatelet therapy.

**Table S3.** Baseline characteristics according to the presence of the main analysis hemodynamic criteria suggestive for left heart disease.

|                                           | Overall<br>(N=69) | No<br>hemodynamic<br>LHD profile<br>(N=52) | Hemodynamic<br>LHD<br>phenotype<br>(N=17) | P                |
|-------------------------------------------|-------------------|--------------------------------------------|-------------------------------------------|------------------|
| Demographics                              |                   |                                            |                                           |                  |
| Age at diagnosis, y                       | 73 ± 4            | 73 ± 4                                     | 73 ± 4                                    | 0.77             |
| Age at enrollment, years                  | 77 ± 5            | 77 ± 4                                     | 77 ± 4                                    | 0.83             |
| Female                                    | 44 (64)           | 31 (60)                                    | 13 (77)                                   | 0.21             |
| Weight, Kg                                | 64 ± 15           | 63 ± 14                                    | 68 ± 18                                   | 0.31             |
| Height, cm                                | 163 ± 9           | 162 ± 10                                   | 163 ± 6                                   | 0.86             |
| BSA, m <sup>2</sup>                       | 1.70 ± 0.22       | 1.68 ± 0.22                                | 1.74 ± 0.24                               | 0.37             |
| BMI, Kg/m <sup>2</sup>                    | 24 ± 5            | 24 ± 4                                     | 25 ± 6                                    | 0.28             |
| Clinical and echocardiographic parameters |                   |                                            |                                           |                  |
| WHO-FC I-II                               | 32 (46)           | 23 (44)                                    | 9 (53)                                    | 0.44             |
| Systemic hypertension                     | 45 (65)           | 33 (64)                                    | 12 (71)                                   | 0.59             |
| Diabetes                                  | 15 (22)           | 12 (23)                                    | 3 (18)                                    | 0.75             |
| CAD                                       | 17 (25)           | 13 (25)                                    | 4 (24)                                    | 0.90             |
| Permanent AF                              | 3 (4)             | 2 (4)                                      | 1 (6)                                     | 0.72             |
| Pulmonary disease                         | 31 (45)           | 26 (50)                                    | 5 (29)                                    | 0.14             |
| CKD                                       | 26 (38)           | 17 (33)                                    | 9 (53)                                    | 0.09             |
| Previous/current cancer                   | 8 (12)            | 6 (12)                                     | 2 (12)                                    | 0.98             |
| SBP, mmHg                                 | 124 ± 15          | 123 ± 15                                   | 124 ± 13                                  | 0.83             |
| DBP, mmHg                                 | 72 ± 9            | 72 ± 9                                     | 71 ± 9                                    | 0.64             |
| SO <sub>2</sub> , %                       | 95 [93; 97]       | 95 [93; 97]                                | 95 [94; 97]                               | 0.75             |
| 6MWD, meters                              | 304 ± 199         | 312 ± 112                                  | 274 ± 147                                 | 0.37             |
| LVEF <50%                                 | 4 (6)             | 3 (6)                                      | 1 (6)                                     | 0.73             |
| LVH                                       | 17 (25)           | 11 (21)                                    | 6 (35)                                    | 0.19             |
| LA dilation                               | 31 (45)           | 22 (42)                                    | 9 (53)                                    | 0.52             |
| TAPSE, mm                                 | 20 ± 5            | 20 ± 5                                     | 20 ± 4                                    | 0.86             |
| TRV, m/s                                  | 3.81 ± 0.76       | 3.93 ± 0.71                                | 3.41 ± 0.80                               | <b>0.02</b>      |
| TAPSE/TRV                                 | 5.6 ± 1.9         | 5.4 ± 1.8                                  | 6.4 ± 2.1                                 | 0.07             |
| RVSP, mmHg                                | 57 [42; 77]       | 62 [45; 83]                                | 45 [36; 63]                               | <b>0.02</b>      |
| RA dilation                               | 53 (77)           | 40 (77)                                    | 13 (77)                                   | 0.91             |
| Pericardial effusion                      | 11 (16)           | 10 (19)                                    | 1 (6)                                     | 0.27             |
| Most recent RHC                           |                   |                                            |                                           |                  |
| RAP, mmHg                                 | 7 [4; 10]         | 6 [3; 10]                                  | 8 [7; 11]                                 | <b>0.02</b>      |
| mPAP, mmHg                                | 41 ± 10           | 42 ± 11                                    | 37 ± 7                                    | 0.07             |
| dPAP, mmHg                                | 25 ± 9            | 26 ± 10                                    | 23 ± 6                                    | 0.20             |
| sPAP, mmHg                                | 70 ± 20           | 72 ± 21                                    | 62 ± 16                                   | 0.12             |
| PAWP, mmHg                                | 11 ± 4            | 10 ± 3                                     | 16 ± 2                                    | <b>&lt;0.001</b> |
| RAP/PAWP ratio                            | 0.60 [0.46; 0.75] | 0.63 [0.45; 0.76]                          | 0.53 [0.46; 0.73]                         | 0.72             |
| PVR, WU                                   | 7.39 ± 4.53       | 8.40 ± 4.73                                | 4.29 ± 1.53                               | <b>0.001</b>     |

|                                        |             |             |             |              |
|----------------------------------------|-------------|-------------|-------------|--------------|
| Cardiac output, L/min                  | 4.59 ± 1.43 | 4.41 ± 1.50 | 5.14 ± 1.07 | 0.07         |
| Cardiac index, L/min/m <sup>2</sup>    | 2.74 ± 0.81 | 2.62 ± 0.81 | 3.09 ± 0.75 | <b>0.04</b>  |
| Diagnosis to last RHC interval, months | 15 [4; 33]  | 13 [2; 30]  | 18 [6; 52]  | 0.26         |
| <hr/>                                  |             |             |             |              |
| Treatment                              |             |             |             |              |
| No PAH therapy                         | 6 (9)       | 5 (10)      | 1 (6)       | 0.64         |
| Bosentan                               | -           | -           | -           |              |
| Ambrisentan                            | 17 (25)     | 13 (25)     | 4 (24)      | 0.90         |
| Macitentan                             | 32 (46)     | 24 (46)     | 8 (47)      | 0.79         |
| ERA                                    | 49 (71)     | 37 (71)     | 12 (71)     | 0.96         |
| Sildenafil                             | 22 (32)     | 14 (27)     | 8 (47)      | 0.12         |
| Tadalafil                              | 25 (36)     | 19 (37)     | 6 (35)      | 0.93         |
| Riociguat                              | 3 (4)       | 3 (6)       | 0           | 0.57         |
| PDE5i/GCs                              | 50 (73)     | 36 (69)     | 14 (82)     | 0.29         |
| Dual oral combination therapy          | 36 (52)     | 26 (50)     | 10 (59)     | 0.53         |
| Selexipag                              | 6 (9)       | 4 (8)       | 2 (12)      | 0.63         |
| Treprostinil                           | -           | -           | -           |              |
| Epoprostenol i.v.                      | 1 (1)       | 1 (2)       | 0           | 0.75         |
| Inhaled iloprost                       | 2 (3)       | 2 (4)       | 0           | 0.57         |
| Beta blockers                          | 9 (13)      | 7 (14)      | 2 (12)      | 0.86         |
| RASi                                   | 23 (33)     | 12 (23)     | 11 (65)     | <b>0.002</b> |
| MRA                                    | 32 (46)     | 26 (50)     | 6 (35)      | 0.35         |
| Furosemide                             | 57 (83)     | 44 (85)     | 13 (77)     | 0.44         |
| Digoxin                                | 6 (9)       | 5 (10)      | 1 (6)       | 0.64         |
| Amiodarone                             | 9 (13)      | 4 (8)       | 5 (29)      | <b>0.04</b>  |
| Warfarin                               | 11 (16)     | 9 (17)      | 2 (12)      | 0.65         |
| DOAC                                   | 11 (16)     | 7 (14)      | 4 (24)      | 0.27         |
| SAPT                                   | 22 (32)     | 16 (31)     | 6 (35)      | 0.73         |
| Statins                                | 26 (38)     | 17 (33)     | 9 (53)      | 0.14         |
| Ezetimibe                              | 3 (4)       | 3 (6)       | 0           | 0.57         |
| Antidiabetic drugs                     | 12 (17)     | 10 (19)     | 2 (12)      | 0.72         |

Characteristics of patients with and without a left heart disease (LHD) phenotype according to the haemodynamic criteria definition (used in both main and secondary analysis). Data are expressed as n (%), mean ± SD or median [IQR], as appropriate.

*LHD*, left heart disease; *BSA*, body surface area; *BMI*, body mass index; *PAH*, pulmonary arterial hypertension; *WHO-FC*, World Health Organization functional class; *CAD*, coronary artery disease; *AF*, atrial fibrillation; *CKD*, chronic kidney disease; *SBP*, systolic blood pressure; *DBP*, diastolic blood pressure; *SO<sub>2</sub>*, oxygen saturation; *6MWD*, six minute walking distance; *LVEF*, left ventricular ejection

fraction; *LVH*, left ventricular hypertrophy; *LA*, left atrium; *TAPSE*, tricuspid annular plane systolic excursion; *TRV*, tricuspid regurgitant velocity; *RVSP*, right ventricular systolic pressure; *RA*, right atrium; *RHC*, right heart catheterization; *RAP*, right atrial pressure; *mPAP*, *dPAP* and *sPAP* for mean, diastolic and systolic pulmonary artery pressure; *PAWP*, pulmonary artery wedge pressure; *PVR*, pulmonary vascular resistance; *ERA*, endothelin receptor antagonist; *PDE5i*, phosphodiesterase type 5 inhibitor; *GCs*, guanylate cyclase stimulator; *RASi*, renin-angiotensin system inhibitors; *MRA*, mineralcorticoid receptor antagonist; *DOAC*, direct oral anticoagulant; *SAPT*, single antiplatelet therapy.

**Table S4.** Baseline characteristics of the study population according to the secondary analysis.

|                                           | Overall<br>(N=69) | No LHD profile<br>(N=32) | LHD phenotype<br>(N=37) | P                |
|-------------------------------------------|-------------------|--------------------------|-------------------------|------------------|
| Demographics                              |                   |                          |                         |                  |
| Age at diagnosis, y                       | 73 ± 4            | 73 ± 4                   | 73 ± 4                  | 0.53             |
| Age at enrolment, years                   | 77 ± 5            | 76 ± 4                   | 78 ± 3                  | 0.12             |
| Female                                    | 44 (64)           | 18 (56)                  | 26 (70)                 | 0.23             |
| Weight, Kg                                | 64 ± 15           | 62 ± 13                  | 67 ± 16                 | 0.16             |
| Height, cm                                | 163 ± 9           | 161 ± 9                  | 164 ± 8                 | 0.10             |
| BSA, m <sup>2</sup>                       | 1.70 ± 0.22       | 1.65 ± 0.21              | 1.74 ± 0.23             | 0.14             |
| BMI, Kg/m <sup>2</sup>                    | 24 ± 5            | 24 ± 4                   | 25 ± 5                  | 0.40             |
| Clinical and echocardiographic parameters |                   |                          |                         |                  |
| WHO-FC I-II                               | 32 (46)           | 15 (47)                  | 17 (46)                 | 0.89             |
| Systemic hypertension                     | 45 (65)           | 17 (53)                  | 28 (76)                 | 0.05             |
| Diabetes                                  | 15 (22)           | 2 (6)                    | 13 (35)                 | <b>0.004</b>     |
| CAD                                       | 17 (25)           | 6 (19)                   | 11 (30)                 | 0.29             |
| Permanent AF                              | 3 (4)             | 1 (3)                    | 2 (5)                   | 0.64             |
| Pulmonary disease                         | 31 (45)           | 17 (53)                  | 14 (38)                 | 0.20             |
| CKD                                       | 26 (38)           | 5 (16)                   | 21 (57)                 | <b>&lt;0.001</b> |
| Previous/current cancer                   | 8 (12)            | 5 (16)                   | 3 (8)                   | 0.33             |
| SBP, mmHg                                 | 124 ± 15          | 125 ± 16                 | 123 ± 14                | 0.68             |
| DBP, mmHg                                 | 72 ± 9            | 74 ± 9                   | 70 ± 9                  | 0.11             |
| SO <sub>2</sub> , %                       | 95 [93; 97]       | 94 [93; 96]              | 96 [94; 97]             | 0.31             |
| 6MWD, meters                              | 304 ± 199         | 326 ± 131                | 279 ± 102               | 0.18             |
| LVEF <50%                                 | 4 (6)             | 1 (3)                    | 3 (8)                   | 0.63             |
| LVH                                       | 17 (25)           | 3 (9)                    | 14 (38)                 | <b>0.005</b>     |
| LA dilation                               | 31 (45)           | 7 (22)                   | 24 (65)                 | <b>0.001</b>     |
| TAPSE, mm                                 | 20 ± 5            | 21 ± 5                   | 20 ± 5                  | 0.64             |
| TRV, m/s                                  | 3.81 ± 0.76       | 3.87 ± 0.69              | 3.75 ± 0.82             | 0.53             |
| TAPSE/TRV                                 | 5.6 ± 1.9         | 5.5 ± 1.9                | 5.7 ± 2.0               | 0.79             |
| RVSP, mmHg                                | 57 [42; 77]       | 65 [43; 77]              | 54 [40; 85]             | 0.50             |
| RA dilation                               | 53 (77)           | 24 (75)                  | 29 (78)                 | 0.29             |
| Pericardial effusion                      | 11 (16)           | 6 (19)                   | 5 (14)                  | 0.55             |
| Most recent RHC                           |                   |                          |                         |                  |
| RAP, mmHg                                 | 7 [4; 10]         | 5 [3; 8]                 | 8 [5; 10]               | <b>0.03</b>      |

|                                        |                   |                   |                   |              |
|----------------------------------------|-------------------|-------------------|-------------------|--------------|
| mPAP, mmHg                             | 41 ± 10           | 42 ± 12           | 40 ± 9            | 0.48         |
| dPAP, mmHg                             | 25 ± 9            | 27 ± 11           | 24 ± 7            | 0.16         |
| sPAP, mmHg                             | 70 ± 20           | 71 ± 21           | 68 ± 19           | 0.47         |
| PAWP, mmHg                             | 11 ± 4            | 10 ± 3            | 12 ± 5            | 0.64         |
| RAP/PAWP ratio                         | 0.60 [0.46; 0.75] | 0.59 [0.39; 0.72] | 0.64 [0.47; 0.81] | 0.28         |
| PVR, WU                                | 7.39 ± 4.53       | 8.50 ± 5.26       | 6.42 ± 3.58       | 0.06         |
| Cardiac output, L/min                  | 4.59 ± 1.43       | 4.39 ± 1.66       | 4.77 ± 1.19       | 0.28         |
| Cardiac index, L/min/m <sup>2</sup>    | 2.74 ± 0.81       | 2.63 ± 0.93       | 2.83 ± 0.70       | 0.32         |
| Diagnosis to last RHC interval, months | 15 [4; 33]        | 12 [4; 30]        | 18 [4; 38]        | 0.48         |
| <hr/>                                  |                   |                   |                   |              |
| Treatment                              |                   |                   |                   |              |
| No PAH therapy                         | 6 (9)             | 2 (6)             | 4 (11)            | 0.50         |
| Bosentan                               | -                 | -                 | -                 |              |
| Ambrisentan                            | 17 (25)           | 7 (22)            | 10 (27)           | 0.62         |
| Macitentan                             | 32 (46)           | 17 (53)           | 15 (41)           | 0.35         |
| ERA                                    | 49 (71)           | 24 (75)           | 25 (68)           | 0.50         |
| Sildenafil                             | 22 (32)           | 9 (28)            | 13 (35)           | 0.53         |
| Tadalafil                              | 25 (36)           | 10 (31)           | 15 (41)           | 0.42         |
| Riociguat                              | 3 (4)             | 3 (9)             | 0                 | 0.06         |
| PDE5i/GCs                              | 50 (73)           | 22 (69)           | 28 (76)           | 0.52         |
| Dual oral combination therapy          | 36 (52)           | 16 (50)           | 20 (54)           | 0.74         |
| Selexipag                              | 6 (9)             | 3 (9)             | 3 (8)             | 0.85         |
| Treprostinil                           | -                 | -                 | -                 |              |
| Epoprostenol i.v.                      | 1 (1)             | 1 (3)             | 0                 | 0.29         |
| Inhaled iloprost                       | 2 (3)             | 1 (3)             | 1 (3)             | 0.92         |
| Beta blockers                          | 9 (13)            | 3 (9)             | 6 (16)            | 0.40         |
| RASi                                   | 23 (33)           | 6 (19)            | 17 (46)           | <b>0.02</b>  |
| MRA                                    | 32 (46)           | 14 (44)           | 18 (49)           | 0.69         |
| Furosemide                             | 57 (83)           | 24 (75)           | 33 (89)           | 0.12         |
| Digoxin                                | 6 (9)             | 3 (9)             | 3 (8)             | 0.85         |
| Amiodarone                             | 9 (13)            | 4 (13)            | 5 (14)            | 0.87         |
| Warfarin                               | 11 (16)           | 5 (16)            | 6 (16)            | 0.91         |
| DOAC                                   | 11 (16)           | 5 (16)            | 6 (16)            | 0.91         |
| SAPT                                   | 22 (32)           | 7 (22)            | 15 (41)           | 0.10         |
| Statins                                | 26 (38)           | 11 (34)           | 15 (41)           | 0.60         |
| Ezetimibe                              | 3 (4)             | 0                 | 3 (8)             | 0.10         |
| Antidiabetic drugs                     | 12 (17)           | 1 (3)             | 11 (30)           | <b>0.004</b> |

Characteristics of patients with and without a left heart disease (LHD) phenotype according to the secondary analysis criteria. Data are expressed as n (%), mean ± SD or median [IQR], as appropriate.

*LHD*, left heart disease; *BSA*, body surface area; *BMI*, body mass index; *PAH*, pulmonary arterial hypertension; *WHO-FC*, World Health Organization functional class; *CAD*, coronary artery disease; *AF*, atrial fibrillation; *CKD*, chronic kidney disease; *SBP*, systolic blood pressure; *DBP*, diastolic blood pressure; *SO<sub>2</sub>*, oxygen saturation; *6MWD*, six minute walking distance; *LVEF*, left ventricular ejection fraction; *LVH*, left ventricular hypertrophy; *LA*, left atrium; *TAPSE*, tricuspid annular plane systolic excursion; *TRV*, tricuspid regurgitant velocity; *RVSP*, right ventricular systolic pressure; *RA*, right atrium; *RHC*, right heart catheterization; *RAP*, right atrial pressure; *mPAP*, *dPAP* and *sPAP* for mean, diastolic and systolic pulmonary artery pressure; *PAWP*, pulmonary artery wedge pressure; *PVR*, pulmonary vascular resistance; *ERA*, endothelin receptor antagonist; *PDE5i*, phosphodiesterase type 5 inhibitor; *GCs*, guanylate cyclase stimulator; *RASi*, renin-angiotensin system inhibitors; *MRA*, mineralocorticoid receptor antagonist; *DOAC*, direct oral anticoagulant; *SAPT*, single antiplatelet therapy.

**Table S5.** Baseline characteristics of the study population according to the secondary analysis clinical criteria suggestive for left heart disease.

|                                           | Overall<br>(N=69) | No LHD profile<br>(N=40) | LHD phenotype<br>(N=29) | P                |
|-------------------------------------------|-------------------|--------------------------|-------------------------|------------------|
| Demographics                              |                   |                          |                         |                  |
| Age at diagnosis, y                       | 73 ± 4            | 72 ± 4                   | 74 ± 4                  | 0.11             |
| Age at enrolment, years                   | 77 ± 5            | 76 ± 4                   | 78 ± 3                  | <b>0.03</b>      |
| Female                                    | 44 (64)           | 23 (58)                  | 21 (73)                 | 0.20             |
| Weight, Kg                                | 64 ± 15           | 63 ± 13                  | 67 ± 18                 | 0.21             |
| Height, cm                                | 163 ± 9           | 161 ± 9                  | 165 ± 9                 | 0.09             |
| BSA, m <sup>2</sup>                       | 1.70 ± 0.22       | 1.67 ± 0.20              | 1.74 ± 0.25             | 0.19             |
| BMI, Kg/m <sup>2</sup>                    | 24 ± 5            | 24 ± 4                   | 25 ± 6                  | 0.55             |
| Clinical and echocardiographic parameters |                   |                          |                         |                  |
| WHO-FC I-II                               | 32 (46)           | 20 (50)                  | 12 (42)                 | 0.66             |
| Systemic hypertension                     | 45 (65)           | 23 (58)                  | 22 (76)                 | 0.11             |
| Diabetes                                  | 15 (22)           | 4 (10)                   | 11 (38)                 | <b>0.005</b>     |
| CAD                                       | 17 (25)           | 10 (25)                  | 7 (24)                  | 0.94             |
| Permanent AF                              | 3 (4)             | 1 (3)                    | 2 (7)                   | 0.38             |
| Pulmonary disease                         | 31 (45)           | 18 (45)                  | 13 (45)                 | 0.99             |
| CKD                                       | 26 (38)           | 11 (28)                  | 15 (52)                 | 0.05             |
| Previous/current cancer                   | 8 (12)            | 7 (18)                   | 1 (3)                   | 0.07             |
| SBP, mmHg                                 | 124 ± 15          | 123 ± 16                 | 124 ± 14                | 0.80             |
| DBP, mmHg                                 | 72 ± 9            | 73 ± 9                   | 70 ± 9                  | 0.33             |
| SO <sub>2</sub> , %                       | 95 [93; 97]       | 94 [93; 96]              | 97 [94; 97]             | 0.18             |
| 6MWD, meters                              | 304 ± 199         | 315 ± 132                | 282 ± 89                | 0.38             |
| LVEF <50%                                 | 4 (6)             | 1 (2)                    | 3 (10)                  | 0.36             |
| LVH                                       | 17 (25)           | 3 (8)                    | 14 (48)                 | <b>&lt;0.001</b> |
| LA dilation                               | 31 (45)           | 7 (18)                   | 24 (83)                 | <b>&lt;0.001</b> |
| TAPSE, mm                                 | 20 ± 5            | 20 ± 5                   | 20 ± 4                  | 0.80             |
| TRV, m/s                                  | 3.81 ± 0.76       | 3.73 ± 0.76              | 3.92 ± 0.77             | 0.32             |
| TAPSE/TRV                                 | 5.6 ± 1.9         | 5.8 ± 2.0                | 5.4 ± 1.9               | 0.42             |

|                                           |                   |                   |                   |              |
|-------------------------------------------|-------------------|-------------------|-------------------|--------------|
| RVSP, mmHg                                | 57 [42; 77]       | 58 [40; 70]       | 57 [44; 89]       | 0.39         |
| RA dilation                               | 53 (77)           | 29 (73)           | 24 (83)           | 0.05         |
| Pericardial effusion                      | 11 (16)           | 7 (18)            | 4 (14)            | 0.68         |
| <hr/>                                     |                   |                   |                   |              |
| Most recent RHC                           |                   |                   |                   |              |
| RAP, mmHg                                 | 7 [4; 10]         | 6 [3; 8]          | 8 [6; 10]         | 0.05         |
| mPAP, mmHg                                | 41 ± 10           | 41 ± 11           | 41 ± 9            | 0.87         |
| dPAP, mmHg                                | 25 ± 9            | 26 ± 10           | 25 ± 7            | 0.71         |
| sPAP, mmHg                                | 70 ± 20           | 69 ± 20           | 70 ± 20           | 0.91         |
| PAWP, mmHg                                | 11 ± 4            | 11 ± 4            | 11 ± 5            | 0.91         |
| RAP/PAWP ratio                            | 0.60 [0.46; 0.75] | 0.55 [0.35; 0.72] | 0.67 [0.53; 0.83] | <b>0.04</b>  |
| PVR, WU                                   | 7.39 ± 4.53       | 7.66 ± 5.05       | 7.00 ± 3.75       | 0.56         |
| Cardiac output, L/min                     | 4.59 ± 1.43       | 4.55 ± 1.63       | 4.65 ± 1.12       | 0.77         |
| Cardiac index, L/min/m <sup>2</sup>       | 2.74 ± 0.81       | 2.74 ± 0.96       | 2.73 ± 0.58       | 0.97         |
| Diagnosis to last RHC<br>interval, months | 15 [4; 33]        | 15 [5; 34]        | 15 [2; 32]        | 0.73         |
| <hr/>                                     |                   |                   |                   |              |
| Treatment                                 |                   |                   |                   |              |
| No PAH therapy                            | 6 (9)             | 2 (5)             | 4 (14)            | 0.20         |
| Bosentan                                  | -                 | -                 | -                 |              |
| Ambrisentan                               | 17 (25)           | 9 (23)            | 8 (28)            | 0.63         |
| Macitentan                                | 32 (46)           | 21 (53)           | 11 (38)           | 0.19         |
| ERA                                       | 49 (71)           | 30 (75)           | 19 (66)           | 0.39         |
| Sildenafil                                | 22 (32)           | 14 (35)           | 8 (28)            | 0.51         |
| Tadalafil                                 | 25 (36)           | 13 (33)           | 12 (41)           | 0.45         |
| Riociguat                                 | 3 (4)             | 3 (8)             | 0                 | 0.13         |
| PDE5i/GCs                                 | 50 (73)           | 30 (75)           | 20 (69)           | 0.58         |
| Dual oral combination<br>therapy          | 36 (52)           | 22 (55)           | 14 (48)           | 0.58         |
| Selexipag                                 | 6 (9)             | 4 (10)            | 2 (7)             | 0.65         |
| Treprostinil                              | -                 | -                 | -                 |              |
| Epoprostenol i.v.                         | 1 (1)             | 1 (3)             | 0                 | 0.40         |
| Inhaled iloprost                          | 2 (3)             | 1 (3)             | 1 (3)             | 0.82         |
| Beta blockers                             | 9 (13)            | 3 (8)             | 6 (21)            | 0.11         |
| RASi                                      | 23 (33)           | 13 (33)           | 10 (35)           | 0.86         |
| MRA                                       | 32 (46)           | 17 (43)           | 15 (52)           | 0.42         |
| Furosemide                                | 57 (83)           | 29 (73)           | 28 (97)           | <b>0.009</b> |
| Digoxin                                   | 6 (9)             | 3 (8)             | 3 (10)            | 0.68         |
| Amiodarone                                | 9 (13)            | 7 (18)            | 2 (7)             | 0.22         |
| Warfarin                                  | 11 (16)           | 6 (15)            | 5 (17)            | 0.75         |
| DOAC                                      | 11 (16)           | 7 (18)            | 4 (14)            | 0.72         |
| SAPT                                      | 22 (32)           | 10 (25)           | 12 (41)           | 0.15         |

|                    |         |         |        |             |
|--------------------|---------|---------|--------|-------------|
| Statins            | 26 (38) | 17 (43) | 9 (31) | 0.33        |
| Ezetimibe          | 3 (4)   | 0       | 3 (10) | <b>0.04</b> |
| Antidiabetic drugs | 12 (17) | 3 (8)   | 9 (31) | <b>0.01</b> |

Characteristics of patients with and without a left heart disease (LHD) phenotype according to the clinical criteria of the secondary analysis. Data are expressed as n (%), mean  $\pm$  SD or median [IQR], as appropriate.

*LHD*, left heart disease; *BSA*, body surface area; *BMI*, body mass index; *PAH*, pulmonary arterial hypertension; *WHO-FC*, World Health Organization functional class; *CAD*, coronary artery disease; *AF*, atrial fibrillation; *CKD*, chronic kidney disease; *SBP*, systolic blood pressure; *DBP*, diastolic blood pressure; *SO<sub>2</sub>*, oxygen saturation; *6MWD*, six minute walking distance; *LVEF*, left ventricular ejection fraction; *LVH*, left ventricular hypertrophy; *LA*, left atrium; *TAPSE*, tricuspid annular plane systolic excursion; *TRV*, tricuspid regurgitant velocity; *RVSP*, right ventricular systolic pressure; *RA*, right atrium; *RHC*, right heart catheterization; *RAP*, right atrial pressure; *mPAP*, *dPAP* and *sPAP* for mean, diastolic and systolic pulmonary artery pressure; *PAWP*, pulmonary artery wedge pressure; *PVR*, pulmonary vascular resistance; *ERA*, endothelin receptor antagonist; *PDE5i*, phosphodiesterase type 5 inhibitor; *GCs*, guanylate cyclase stimulator; *RASi*, renin-angiotensin system inhibitors; *MRA*, mineralcorticoid receptor antagonist; *DOAC*, direct oral anticoagulant; *SAPT*, single antiplatelet therapy.
